# Supplementary material
Source: PubMed Central journal article supplement (PMC4495761)

**Filtered and Predicted PSD Value with 90% CI  
(Progressing AGIS Patient)**

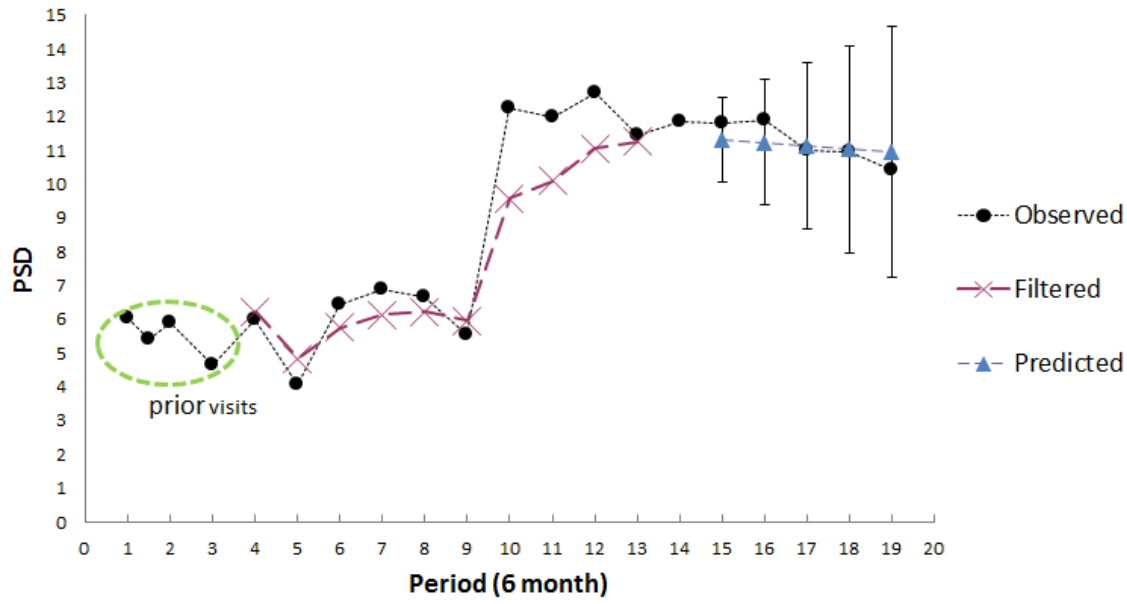

**Filtered and Predicted IOP Value with 90% CI  
(Non-Progressing CIGTS Patient)**

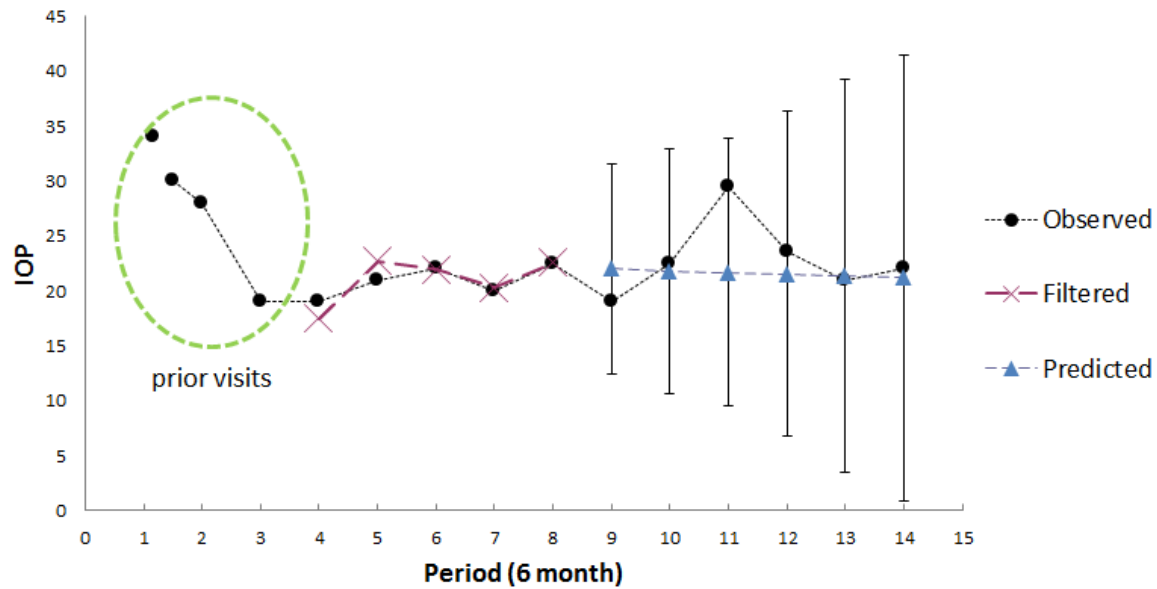

Supplement: NIHMS668463-supplement-1.pdf [file NIHMS668463-supplement-1.pdf]
