# Supplementary material
Source: PubMed Central journal article supplement (PMC4495761)
Supplement: NIHMS668463-supplement-2.pdf [file NIHMS668463-supplement-2.pdf]

**Table 3: 95% Confidence Intervals for Kalman Filter Error**

| Variable     | 95% Confidence Interval |                   |                   |
|--------------|-------------------------|-------------------|-------------------|
|              | 6 Months                | 2 Years           | 5 Years           |
| Present MD   | (-0.1493, 0.0329)       | (-0.1294, 0.1361) | (-0.2979, 0.3882) |
| MD Velocity  | (-0.0163, -0.0003)      | (-0.0175, 0.0024) | (-0.0361, 0.0000) |
| Present PSD  | (0.0163, 0.1227)        | (0.1308, 0.2880)  | (0.4675, 0.8394)  |
| PSD Velocity | (0.0065, 0.0168)        | (0.0039, 0.0166)  | (-0.0028, 0.0195) |
| Present IOP  | (-0.2487, 0.0121)       | (-0.2751, 0.0792) | (-0.6454, 0.0519) |
| IOP Velocity | (-0.0033, 0.0194)       | (-0.0117, 0.0185) | (-0.0365, 0.0175) |

The 95% confidence intervals of the Kalman filter error for each of the variables contain 0 or are close to containing 0 when the Kalman filter is used to predict 6 months, 2 years, and 5 years into the future. This means the values predicted by the Kalman filter are not significantly different from the values observed ( $\alpha=0.05$ ).

MD = mean deviation; PSD = pattern standard deviation; IOP = intraocular pressure
